# Supplementary material for: Process-based modelling of multi-decade carbon dynamics of a cool temperate swamp
Source: Copernicus journal article supplement (doi:10.5194/egusphere-2024-4049), 2025-02-10
Supplement: Supplementary file [file egusphere-2024-4049-AC1-supplement.pdf]

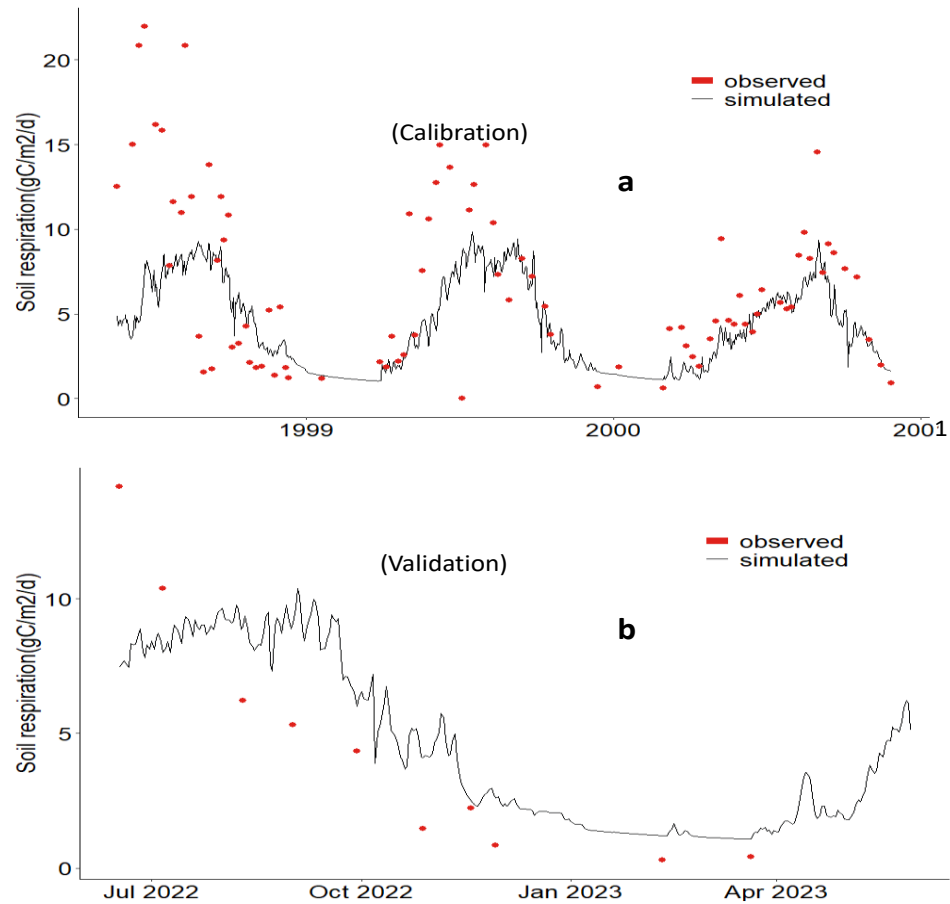

**Figure 9. Calibration (a) of simulated soil respiration rates (May 1998- Dec 2000) and validation period (June, 2022 – May, 2023)**

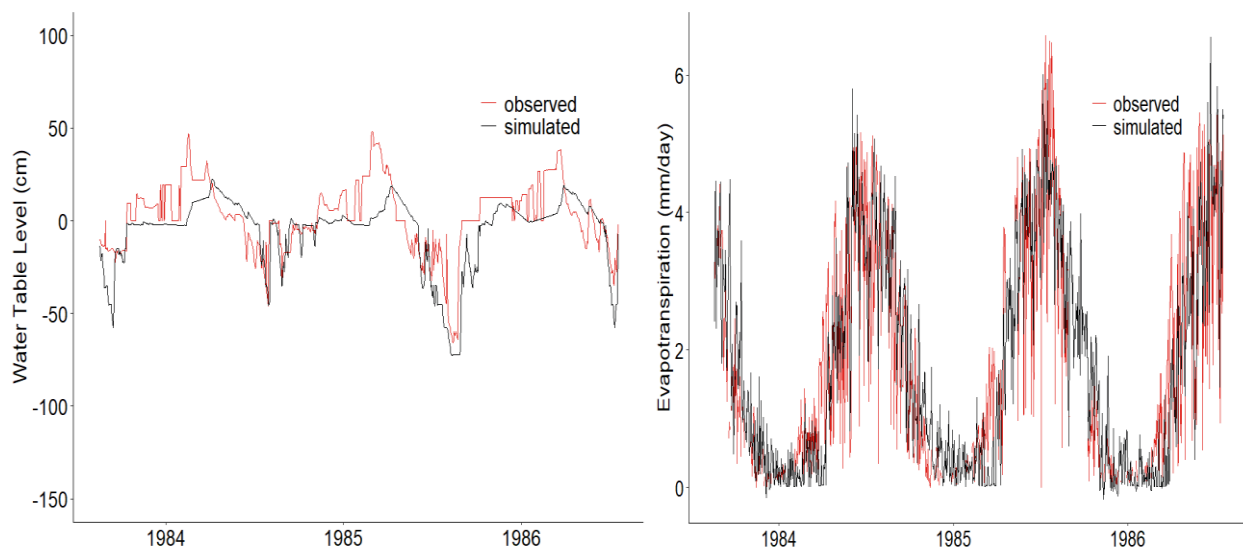

**Figures 5 & 8: Calibration period of simulated water table level (left) and evapotranspiration (right) from 1983 to 1987**
