# Supplementary material for: Process-based modelling of multi-decade carbon dynamics of a cool temperate swamp
Source: Copernicus journal article supplement (doi:10.5194/egusphere-2024-4049), 2025-02-10
Supplement: Supplementary file [file egusphere-2024-4049-AC2-supplement.pdf]

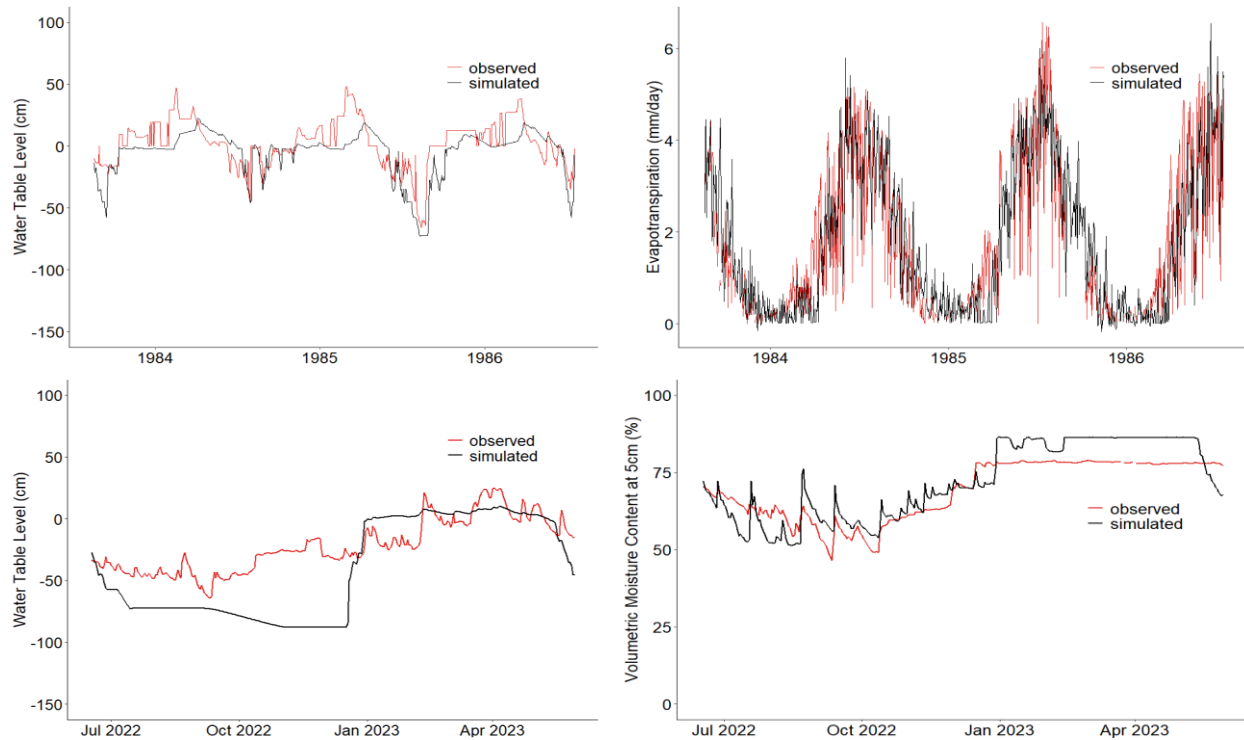

**Figures showing the performance of simulated hydrological variables relative to measurements for Water Table Level (upper and lower left), Evapotranspiration (upper right) and VMC at 5cm (lower right). Calibration period is from August 1983- July 1987, while validation period is from June, 2022 to May, 2023**

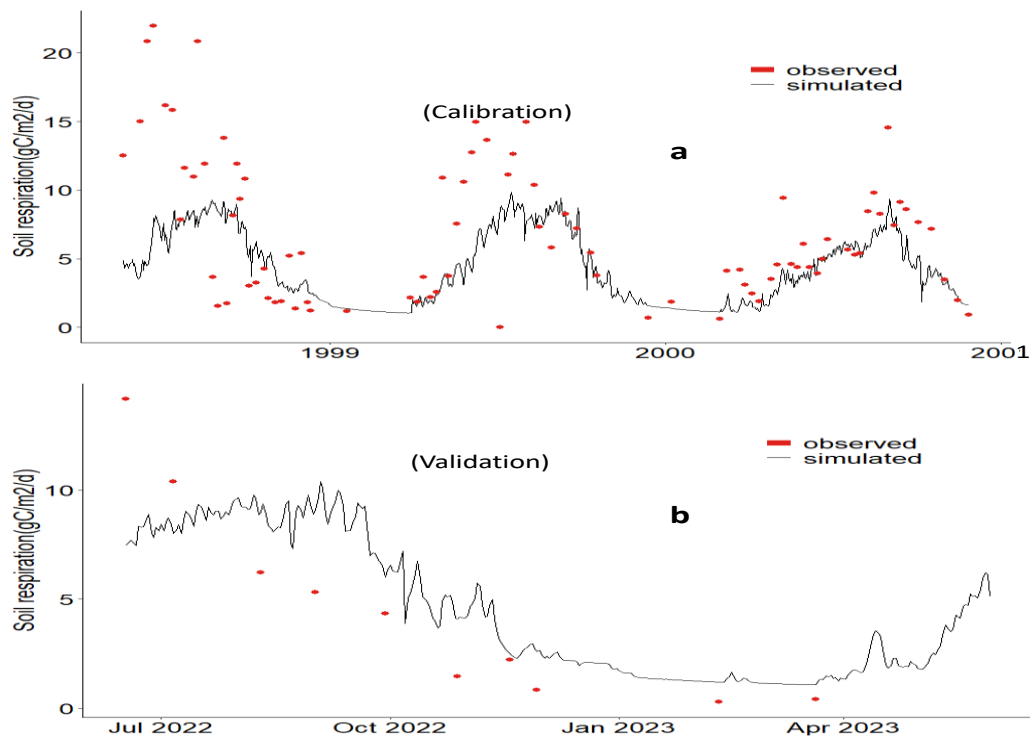

**Figure 9. Calibration (a) of simulated soil respiration rates (May 1998- Dec 2000) and validation period (June, 2022 – May, 2023)**
